# Supplementary material for: Educational mobility and weight gain over 13 years in a longitudinal study of young women
Source: PubMed Central journal article supplement (PMC4289243; doi:10.1186/1471-2458-14-1219), 2014-11-25
Supplement: 12889_2014_7393_MOESM1_ESM.pdf [file 12889_2014_7393_MOESM1_ESM.pdf]

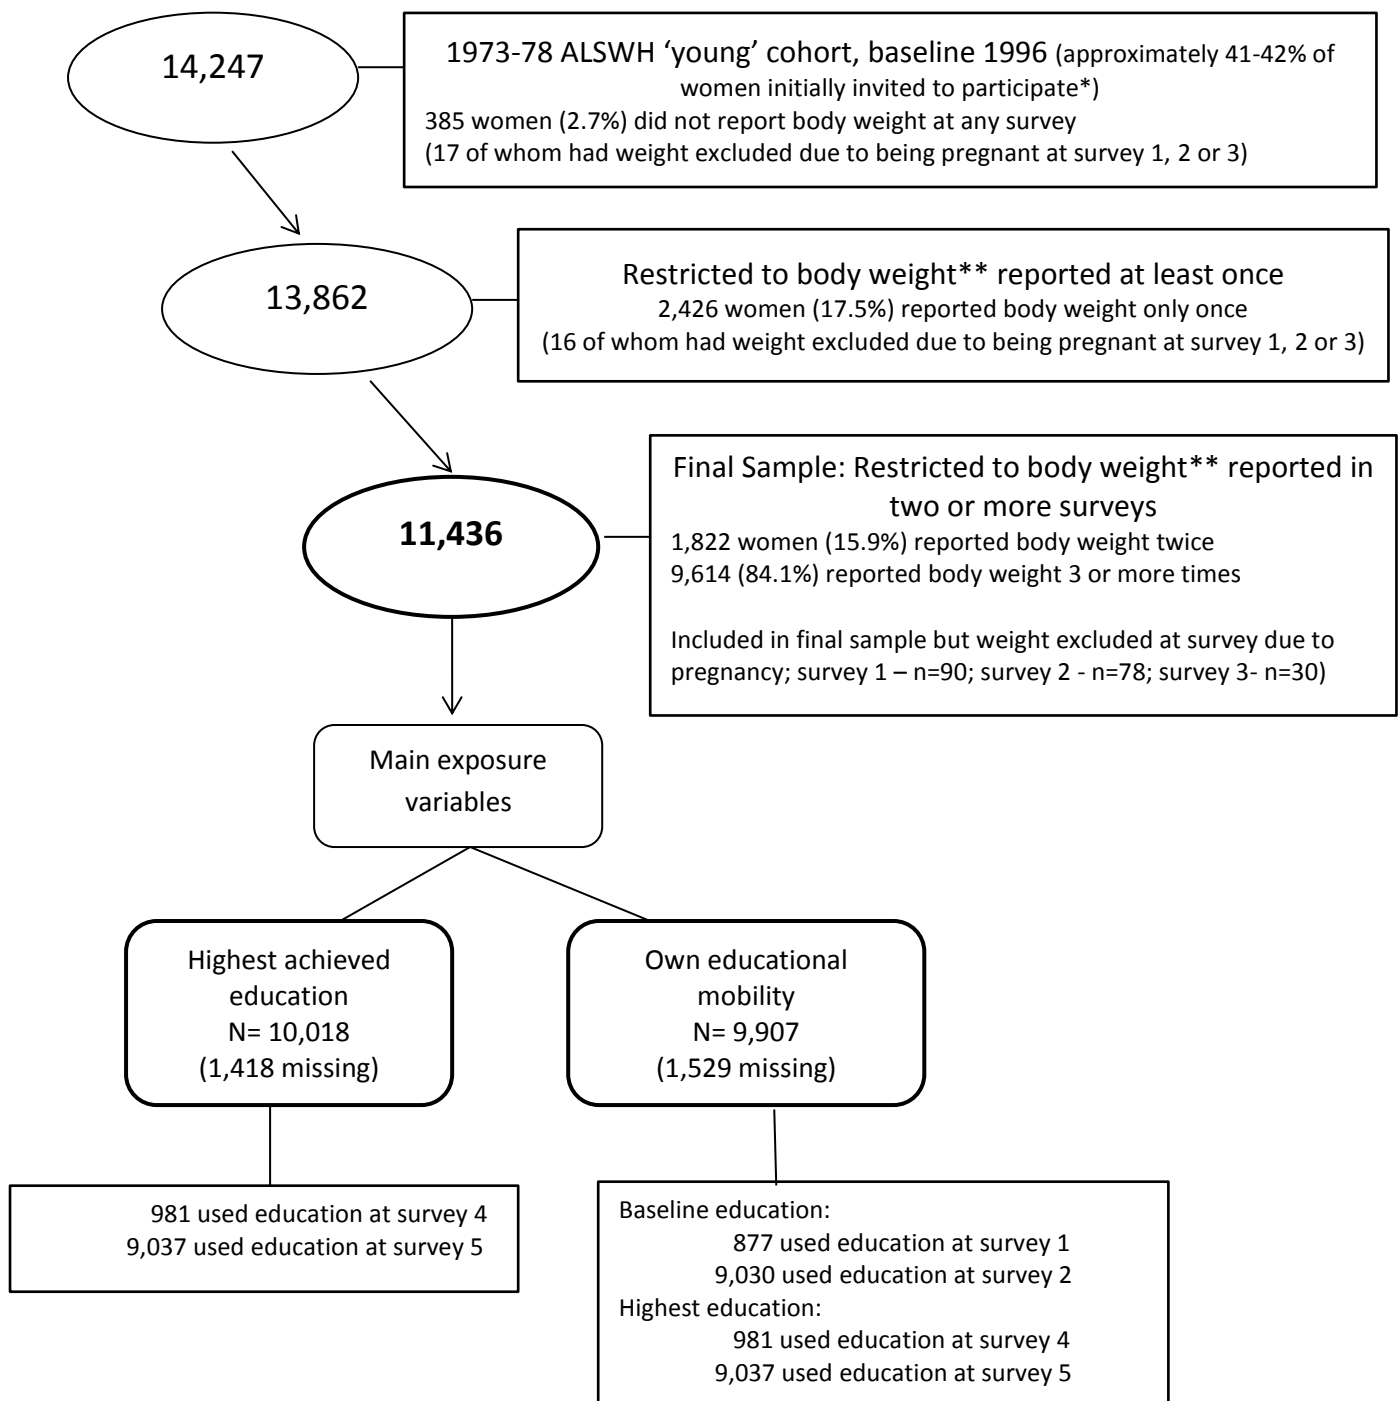

\*see [alswh.org.au/about/sample](http://alswh.org.au/about/sample)

\*\*refers to non-pregnant body weight – reported body weight for women pregnant at survey 1, 2 or 3 was excluded (see methods)
