# Supplementary material for: Educational mobility and weight gain over 13 years in a longitudinal study of young women
Source: PubMed Central journal article supplement (PMC4289243; doi:10.1186/1471-2458-14-1219), 2014-11-25
Supplement: 12889_2014_7393_MOESM2_ESM.pdf [file 12889_2014_7393_MOESM2_ESM.pdf]

**Additional File 2: Baseline weight and weight gain\* over 13 years by highest education<sup>†</sup> in 1973-78 cohort ALSWH women, using multiply imputed data (n=13 862\*\*)**

|                                                                                    | % weighted<br>(unweighted) | Model 1<br>Estimate (95% CI) | Model 2<br>Estimate (95%CI) |
|------------------------------------------------------------------------------------|----------------------------|------------------------------|-----------------------------|
| <b>Baseline weight (kg)</b>                                                        |                            | 60.44 (59.99, 60.88)         | 57.58 (56.72, 58.44)        |
| <i>Difference in baseline weight by highest achieved education<sup>†</sup></i>     |                            |                              |                             |
| High                                                                               | 49.1 (44.5)                | Reference                    | Reference                   |
| Intermediate                                                                       | 29.7 (31.3)                | 2.07 (1.45, 2.69)            | 1.18 (0.59, 1.78)           |
| Low                                                                                | 21.2 (24.2)                | 2.29 (1.53, 3.05)            | 1.11 (0.36, 1.87)           |
| <b>Increase per survey (kg)</b>                                                    |                            | 0.72 (0.66, 0.77)            | 1.23 (1.16, 1.29)           |
| <i>Difference in increase per survey by highest achieved education<sup>†</sup></i> |                            |                              |                             |
| High                                                                               |                            | Reference                    | Reference                   |
| Intermediate                                                                       |                            | 0.27 (0.23, 0.31)            | 0.24 (0.21, 0.28)           |
| Low                                                                                |                            | 0.34 (0.30, 0.38)            | 0.29 (0.25, 0.33)           |
| <b>Attenuation per survey (Survey*survey)</b>                                      |                            | -0.01 (-0.02,-0.01)          | -0.05 (-0.05, -0.04)        |

\* random effects models (intercept only) with weight measured at age 18-23 years, 22-27 years, 25-30 years, 28-33 years and 31-36 years

<sup>†</sup> education achieved at Survey Five (Low - higher school certificate or lower ( $\leq 12$  years), Intermediate - trade/certificate/diploma, High - degree/higher degree)

\*\* women with at least one body weight

Model 1 – Baseline centred age, baseline centred height and area of residence

Model 2- Model 1 + country of birth, physical activity, alcohol intake, mental health, income management, self-rated health, age at first birth, living arrangements, marital status, shape dissatisfaction
