# Supplementary material for: Educational mobility and weight gain over 13 years in a longitudinal study of young women
Source: PubMed Central journal article supplement (PMC4289243; doi:10.1186/1471-2458-14-1219), 2014-11-25
Supplement: 12889_2014_7393_MOESM3_ESM.pdf [file 12889_2014_7393_MOESM3_ESM.pdf]

**Additional File 3: Baseline weight and weight gain\* over 13 years by educational mobility† in 1973-78 cohort ALSWH women, using multiply imputed data (n=13 862\*\*)**

|                                                                   | % weighted<br>(unweighted) | Model 1<br>Estimate (95% CI) | Model 2<br>Estimate (95% CI) |
|-------------------------------------------------------------------|----------------------------|------------------------------|------------------------------|
| <b>Baseline weight (kg)</b>                                       |                            | 62.50 (61.80, 63.21)         | 56.21 (55.06, 57.37)         |
| <i>Difference in baseline weight by educational mobility†</i>     |                            |                              |                              |
| Stable low                                                        | 20.7 (23.8)                | Reference                    | Reference                    |
| Low-intermediate                                                  | 10.4 (11.4)                | -0.94 (-2.03, 0.15)          | -0.84 (-1.85, 0.17)          |
| Stable intermediate                                               | 20.0 (20.7)                | 0.53 (-0.38, 1.45)           | 0.74 (-0.14, 1.63)           |
| Upgrade to high                                                   | 13.3 (12.3)                | -1.99 (-2.97, -1.02)         | -1.19 (-2.14, -0.24)         |
| Stable high                                                       | 35.6 (31.9)                | -2.02 (-2.77, -1.27)         | -0.87 (-1.62, -0.12)         |
| <b>Increase per survey (kg)</b>                                   |                            | 1.07 (1.00, 1.13)            | 1.51 (1.44, 1.59)            |
| <i>Difference in increase per survey by educational mobility†</i> |                            |                              |                              |
| Stable low                                                        |                            | Reference                    | Reference                    |
| Low-intermediate                                                  |                            | 0.01 (-0.06, 0.06)           | 0.01 (-0.05, 0.07)           |
| Stable intermediate                                               |                            | -0.12 (-0.17, -0.07)         | -0.09 (-0.15, -0.04)         |
| Upgrade to high                                                   |                            | -0.28 (-0.34, -0.23)         | -0.23 (-0.29, -0.17)         |
| Stable high                                                       |                            | -0.37 (-0.41, -0.32)         | -0.32 (-0.37, -0.27)         |
| <b>Attenuation per survey (survey x survey)</b>                   |                            | -0.01 (-0.02, -0.01)         | -0.05 (-0.05-0.04)           |

\* random effects models (intercept only) with weight measured at age 18-23 years, 22-27 years, 25-30 years, 28-33 years and 31-36 years

† change in education level from early-mid twenties to early-mid thirties: (Low - higher school certificate or lower ( $\leq 12$  years), Intermediate - trade/certificate/diploma, High - degree/higher degree). Upgrade to high includes women who had a low (70%) or intermediate (30%) education who later upgraded to a high education.

\*\* women with at least one body weight

Model 1 – baseline centred age, baseline centred height and area of residence

Model 2 - Model 1 + physical activity, alcohol intake, mental health, self-rated health, number of children, smoking, age at first birth, living arrangement, marital status, health transition, shape dissatisfaction, income management and country of birth
